# Supplementary material
Source: publisher site journal article supplement (https://www.dovepress.com/article/388462)

| 1. For your RIGHT/LEFT eye alone, please rate your ability to perform up close activities with VERY SMALL PRINT (like reading the fine print in a phonebook or drug package insert) without glasses in that eye:   [Poor □ 1 □ 2] [Fair □ 3 □ 4] [Good □ 5 □ 6] [Very Good □ 7 □ 8] [Excellent □ 9 □ 10] |
| --- |
| 1. For your RIGHT/LEFT eye alone, please rate your ability to perform up close activities with MODERATELY SIZED PRINT (like reading the print of a newspaper) without glasses in that eye:   [Poor □ 1 □ 2] [Fair □ 3 □ 4] [Good □ 5 □ 6] [Very Good □ 7 □ 8] [Excellent □ 9 □ 10] |
| 1. For your RIGHT/LEFT eye alone, please rate your ability to perform ARM’S-LENGTH ACTIVITIES (like working on a computer) without glasses in that eye:   [Poor □ 1 □ 2] [Fair □ 3 □ 4] [Good □ 5 □ 6] [Very Good □ 7 □ 8] [Excellent □ 9 □ 10] |
| 1. For your RIGHT/LEFT eye alone, please rate your ability to perform activities when LOOKING FAR AWAY (like watching TV or driving) without glasses in that eye:   [Poor □ 1 □ 2] [Fair □ 3 □ 4] [Good □ 5 □ 6] [Very Good □ 7 □ 8] [Excellent □ 9 □ 10] |
| 1. If you had to perform DISTANCE vision activities (like TV, driving, etc.) with your RIGHT/LEFT eye alone, how often do you think you would choose to wear glasses if you could only use that eye?   Please check one □ None of the time □ Some of the time □ Half of the time □ Most of the time □ All of the time |
| 1. If you had to perform UP CLOSE vision activities with VERY SMALL PRINT (like reading a phonebook or drug package insert) with your RIGHT/LEFT eye alone, how often do you think you would choose to wear glasses if you could only use that eye?   Please check one □ None of the time □ Some of the time □ Half of the time □ Most of the time □ All of the time |
| 1. If you had to perform UP CLOSE activities with MODERATELY SIZED PRINT (like reading a book or newspaper) with your RIGHT/LEFT eye alone, how often do you think you would choose to wear glasses if you could only use that eye?   Please check one □ None of the time □ Some of the time □ Half of the time □ Most of the time □ All of the time |
| 1. If you had to perform all of your ARM’S-LENGTH activities (like COMPUTER WORK) with your RIGHT/LEFT eye alone, how often do you think you would choose to wear glasses if you could only use that eye?   Please check one □ None of the time □ Some of the time □ Half of the time □ Most of the time □ All of the time |
| 1. OVERALL, with your RIGHT/LEFT eye alone, HOW SATISFIED ARE YOU IN GENERAL (considering ALL TYPES OF VISION – distance, intermediate, & near) with your vision without glasses?   Please check one □ Very satisfied □ Satisfied □ No difference □ Dissatisfied □ Very dissatisfied |
| 1. In general, do you experience HALOS with your RIGHT/LEFT eye while driving at night?   Please check one □ None of the time □ Some of the time □ Half of the time □ Most of the time □ All of the time |
| 1. If you do experience HALOS, how bothersome are the halos that you experience with your RIGHT/LEFT eye?   [Not at all □ 1 □ 2] [A little □ 3 □ 4] [Somewhat □ 5 □ 6] [Very □ 7 □ 8] [Extremely □ 9 □ 10] |
| 1. In general, do you experience GLARE with your RIGHT/LEFT eye while driving at night?   Please check one □ None of the time □ Some of the time □ Half of the time □ Most of the time □ All of the time |
| 1. If you do experience GLARE, how bothersome is the glare that you experience with your RIGHT/LEFT eye?   [Not at all □ 1 □ 2] [A little □ 3 □ 4] [Somewhat □ 5 □ 6] [Very □ 7 □ 8] [Extremely □ 9 □ 10] |
| 1. In general, do you experience STARBURSTS with your RIGHT/LEFT eye while driving at night?   Please check one □ None of the time □ Some of the time □ Half of the time □ Most of the time □ All of the time |
| 1. If you do experience STARBURSTS, how bothersome are the starbursts that you experience with your RIGHT/LEFT eye?   [Not at all □ 1 □ 2] [A little □ 3 □ 4] [Somewhat □ 5 □ 6] [Very □ 7 □ 8] [Extremely □ 9 □ 10] |
| 1. In general, taking all types of light phenomena into consideration, how often do you experience any light phenomena with your RIGHT/LEFT eye while driving at night?   Please check one □ None of the time □ Some of the time □ Half of the time □ Most of the time □ All of the time |
| 1. If you do experience any type of LIGHT PHENOMENA with your RIGHT/LEFT eye while driving at night, IN GENERAL, how bothersome is this light phenomena that you experience with your RIGHT/LEFT eye?   [Not at all □ 1 □ 2] [A little □ 3 □ 4] [Somewhat □ 5 □ 6] [Very □ 7 □ 8] [Extremely □ 9 □ 10] |
| If given the opportunity, would you again choose to pay out of pocket to have surgery with premium implants or would you elect to receive insurance covered implants that do not have the advanced optics of the premium implants?  □ I would still elect to pay out of pocket for a premium implant □ I would elect to receive implants covered by insurance |
| With all things considered, which eye do you prefer?  □ Right □ Left □ No preference |

Supplemental Table 1. Patient Questionnaire

Supplemental Table 2. Frequency of Glasses Use Intermediate as Dependent Variable

| PanOptix (n=30)  “Frequency of Glasses Use Intermediate” R2 = .44 | | P value |
| --- | --- | --- |
| + 3.789 | Constant | = 0.010 |
| + 2.081 | Linear CS | <0.001 |
| + 1.339 | Bullseye CS | = 0.040 |

CS = Contrast Sensitivity

Supplemental Table 3. Intermediate Vision – Jaeger as Dependent Variable

Supplemental Figure 1

| +3.25 (n=30)  “Intermediate Vision – Jaeger” R2 = .89 | | P value |
| --- | --- | --- |
| - 0.221 | Constant |  |
| + 0.20 | Photopic Pupil | = 0.009 |


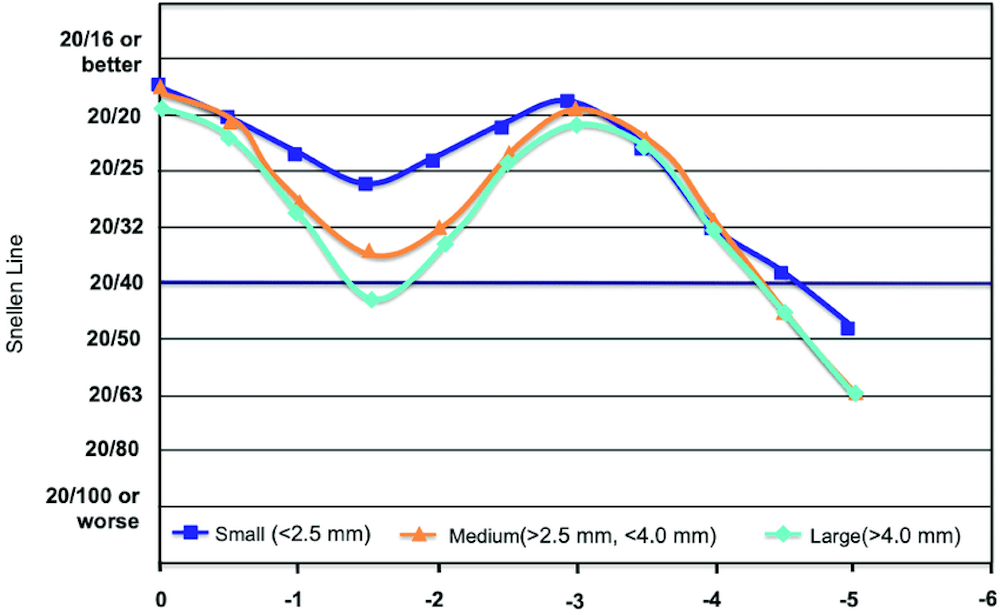

Supplement: Supplementary file 1 [file get_supplementary_file.php]
